# Supplementary material
Source: PubMed Central journal article supplement (PMC2000691)
Supplement: tjp0577-0127_sd1.pdf [file tjp0577-0127_sd1.pdf]

Supplemental Material Figure 1. Harvey, Duguid Krasel & Stephens

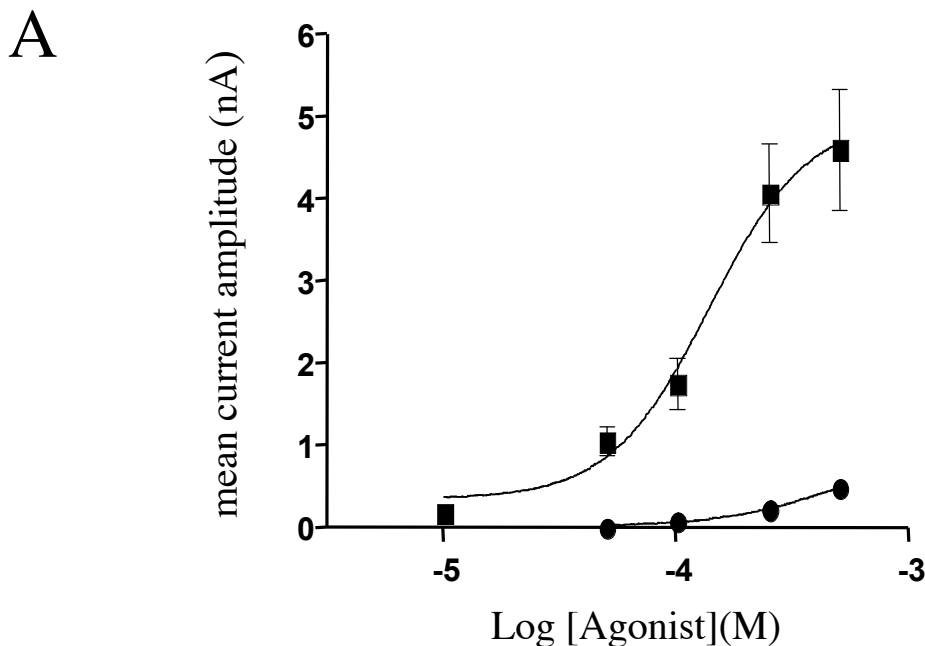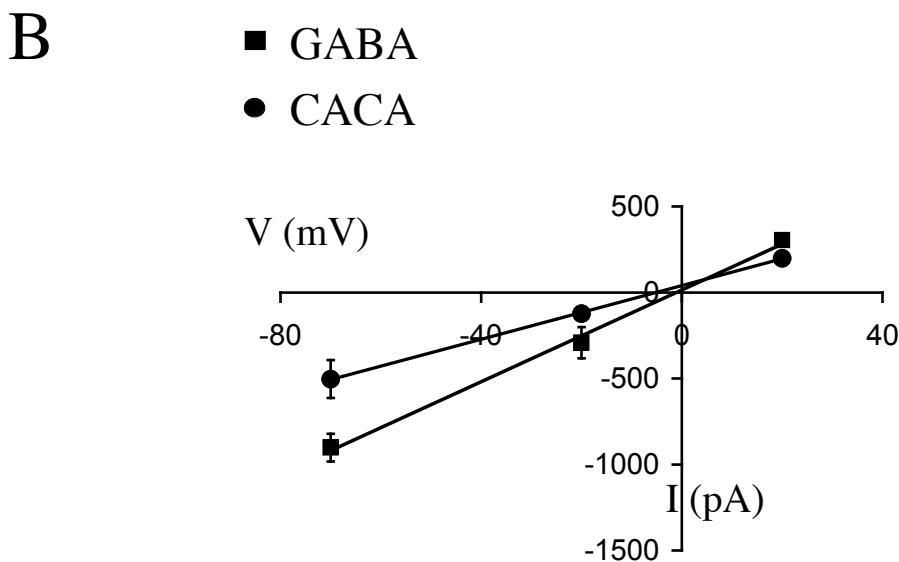

**Supplementary Material Figure 1.**

**Ionotropic GABA receptor agonists evoke membrane currents in Purkinje cells**

A) Log dose-response relationship for agonist-evoked current,  $V_H = -70$  mV. Points are means  $\pm$  S.E.M. Data were fitted to the Hill equation:  $I = I_{max}/(1 + (EC_{50}/C)^n)$ , where  $I$  represents the normalized current,  $I_{max}$  the maximal normalized current,  $C$  the agonist concentration,  $EC_{50}$  the agonist concentration that produced half-maximal responses, and  $n$  the Hill coefficient. For the GABA data, the Hill coefficient was 2.52 and the  $EC_{50}$  was 142  $\mu$ M. The CACA dose-response relationship was constrained with a Hill slope co-efficient equivalent to that for GABA and assumed to be an agonist with a maximum activity less than that of GABA. CACA may be contaminated by up to 0.1 % by the *trans* enantiomer, which can act more potently than CACA on both  $GABA_A$  and  $GABA_C$  receptors; therefore, the maximum concentration of CACA used was 500  $\mu$ M. B) Voltage dependence of agonist-induced current. Agonist-evoked currents were linear over the voltage range tested. Currents reversed direction close to 0 mV for both GABA ( $-0.1 \pm 2.2$  mV,  $n=5$ ) and CACA ( $-5.7 \pm 4.3$  mV,  $n=5$ ), consistent with the activation of a  $Cl^-/HCO_3^-$  anionic conductance for the solutions used here.
